1 **PREFERENTIAL SYNTHESIS OF VERY LONG CHAIN POLYUNSATURATED**  
2 **FATTY ACIDS IN *EUTREPTIELLA* SP. (EUGELNOZOA) REVEALED BY**  
3 **CHROMATOGRAPHIC AND TRANSCRIPTOMIC ANALYSES<sup>1</sup>**  
4

5 **Rita C. Kuo<sup>2</sup>**

6 Department of Marine Sciences, University of Connecticut, Groton, CT 06340, USA

7 **Huan Zhang**

8 Department of Marine Sciences, University of Connecticut, Groton, CT 06340, USA

9 **James D. Stuart**

10 Department of Chemistry, University of Connecticut, Storrs, CT 06269, USA

11 **Anthony A. Provatas**

12 Center of Environmental Sciences and Engineering, University of Connecticut, Storrs, CT  
13 06269, USA

14 **Linda Hannick**

15 SAIC-Frederick, Inc., Frederick National Laboratory for Cancer Research, Rockville, MD  
16 20852, USA

17 **Senjie Lin<sup>3</sup>**

18 Department of Marine Sciences, University of Connecticut, Groton, CT 06340, USA  
19

20 <sup>1</sup>Received May 20, 2020

21 <sup>2</sup>Current address: Joint Genome Institute, Lawrence Berkeley National Laboratory, Walnut  
22 Creek, CA 94598, USA.

23 <sup>3</sup>Address for correspondence: Phone, 860-405-9168; Email, [senjie.lin@uconn.edu](mailto:senjie.lin@uconn.edu)

24  
25 Running Title: Fatty acid and lipid synthesis in alga *Eutreptiella*  
26  
27  
28  
29

---

31 **Abstract**

32  
33 Algal lipids are important fuel storage molecules in algae and a currency for energy transfer in  
34 the marine food chain as well as materials for biofuel production, but their production and  
35 regulation are not well understood in many species including the common coastal phytoplankton  
36 *Eutreptiella* spp. Here, using gas chromatography-tandem mass spectrometry (GC/MS/MS), we  
37 discovered 24 types of fatty acids (FAs) in *Eutreptiella* sp. with a relatively high proportion of  
38 long chain unsaturated FAs. The abundances of C16, C18 and saturated FAs decreased when  
39 phosphate in the culture medium was depleted. Among the 24 FAs, docosahexaenoic acid (22:6)  
40 and eicosapentaenoic acid (20:5) were the most abundant, suggesting that *Eutreptiella* sp.  
41 preferentially invests in the synthesis of very long chain polyunsaturated fatty acids (VLCPPFA).  
42 Further transcriptomic analysis revealed that *Eutreptiella* sp. likely synthesizes VLCPPFA via  $\Delta 8$   
43 pathway and uses type I and II fatty acid synthases. Using RT-qPCR, we found that some of the  
44 lipid production genes, such as  $\beta$ -ketoacyl-ACP reductase, fatty acid desaturase, acetyl-CoA  
45 carboxylase, acyl carrier protein,  $\Delta 8$  desaturase, and Acyl-ACP thioesterase, were more actively  
46 expressed during light period. Besides, two carbon-fixation genes were more highly expressed in  
47 the high lipid illuminated cultures, suggesting a linkage between photosynthesis and lipid  
48 production.

49

50 **Keywords:** *Eutreptiella*, lipid biosynthesis, nutrient limitation, transcriptomic, unsaturated fatty  
51 acids

52

53

## 54 **Introduction**

55 Lipids are important fuel storage molecules in algae as well as other organisms, and as algae are  
56 the base of the aquatic ecosystem, lipids are an important currency of energy transfer in the  
57 aquatic food chain (Jonasdottir 2019). Lipid content also represents the quality of an alga as  
58 materials for biofuel production (Sajjadi et al. 2018). Within algae, lipids are essential for  
59 structural constituents of cellular membranes in all organisms and protection of delicate internal  
60 organs and hormones in animals (Singh 2002). In the marine ecosystem, fatty acids are a  
61 fundamental energy source for growth and cell membrane fluidity (especially in cold water) in  
62 animals such as zooplankton and fish (*e.g.* Arzel et al. 1994, Cossins et al. 1977, Klein Breteler  
63 2004, Rainuzzo et al. 1997, Tang and Taal 2005), which consume phytoplankton as food. To  
64 gain better understanding on the energy flow in marine food chains, it is important to study fatty  
65 acid and lipid biosynthesis pathways in dominant phytoplankton (prey) species. As the type and  
66 abundance of lipids in the cells also determine the potential of algae as source of biofuel,  
67 understanding the regulatory pathways of lipid production in algae is also important for  
68 evaluating or genetically enhancing algal species for biofuel production.

69 In land plants, photosynthesis produces small precursors for lipid production in  
70 chloroplasts. The small precursors are later converted into long chain fatty acids via two enzyme  
71 systems, acetyl-CoA carboxylase (ACCase) and fatty acid synthase (FAS). ACCase is essential  
72 for lipid metabolism as it catalyzes the first step of fatty acid synthesis and is found in both  
73 bacteria and eukaryotes (Cronan and Waldrop 2002, Harwood 1988). FAS consists of 6 enzyme  
74 activities and an acyl-carrier protein (CA) to catalyze a 2 carbon elongation process (Bloch and  
75 Vance 1977, Nelson and Cox 2008). It produces palmitate and stearate and these fatty acids are  
76 subject to elongation, desaturation or further modification by elongase or desaturase in

77 chloroplasts (Gunstone et al. 2007). There are two major types of fatty acid synthases. Fatty acid  
78 synthase I (FASI), found in vertebrates and fungi, consists of a multi-enzyme complex contained  
79 in a single polypeptide chain (Nelson and Cox 2008, Schweizer and Hofmann 2004). In contrast,  
80 fatty acid synthase II (FASII), found in plants and bacteria, contains discrete enzymes (Nelson  
81 and Cox 2008, White et al. 2005). Among euglenoid algae, *Euglena gracilis* composes both  
82 FASI and plastid FASII for *de novo* fatty acid synthesis (Delo et al. 1971, Worsham et al. 1993).  
83 In addition to FASII, Goldberg and Bloch (1972) reported another ACP-dependent fatty acid  
84 synthase (FASIII) that elongates acyl-CoA derivatives from C10 to C18 to longer chain ACP  
85 thioesters in plastids.

86         Similar to land plants, microalgae initiate fatty acid synthesis in chloroplasts (Guschina  
87 and Hardwood, 2006) and lipid biosynthesis is probably linked directly to photosynthesis.  
88 Studies have shown that the activities of ACCase are related to the light reactions of  
89 photosynthesis, as NADPH and ATP produced in the photochemical reaction are required for the  
90 synthesis of palmitic acid (Sasaki et al. 1997). Furthermore, fatty acid synthesis in photosynthetic  
91 organisms obviously relies on carbon fixation for carbon precursors for fatty acid synthesis (Bao  
92 et al. 2000). The synthesized fatty acids are in turn used for triacylglycerol (TAG) synthesis  
93 (Thelen and Ohlrogge 2002). In addition, dihydroxyacetone phosphate, the precursor for glycerol  
94 3-phosphate needed in the synthesis of lipid TAG, can be produced from Calvin-Benson Cycle  
95 (Nelson and Cox 2008).

96         It is well understood that lipid production in microalgae is influenced by nutrient and  
97 other environmental conditions (e.g. Gouveia and Oliveira 2009, Griffiths and Harrison 2009, Hu  
98 et al. 2008, Illman et al. 2000, Liu et al. 2008). Nutrient limitation can enhance the production of  
99 lipid in algal cells. For example, the lipid content of some *Chlorella* species (e.g. *C. emersonii*

100 *and C. pyrenoidosa*) can increase to more than 60% of the dry weight under nitrogen-deprived  
101 conditions (Griffiths and Harrison 2009, Illman et al. 2000). However, our knowledge of the  
102 genetic regulatory mechanisms of lipid biosynthesis in marine microalgae is limited and  
103 fragmentary (Guchina and Harwood 2006, Hu et al., 2008), particularly for euglenids such as  
104 *Eutreptiella* spp.

105 *Eutreptiella* is a genus of photosynthetic euglenoid, which have excellent nutritive value  
106 (*i.e.* high vitamin and lipid content, Takeyama et al., 1996; Yamane et al., 2001) and are rather  
107 abundant in some marine ecosystems (Henriksen et al. 2002). Some *Eutreptiella* spp. can  
108 seasonally be a dominant group of phytoplankton (Álvarez-Góngora and Herrera-Silveira 2006,  
109 Bates and Strain 2006, Olli et al. 1996, Rodríguez-Graña et al. 2008, Seong et al. 2006), forming  
110 blooms in nutrient-rich coastal or brackish waters (Anderson et al. 2000, Lindholm 1993, Olli et  
111 al. 1996, Stonik and Selina 200, Stonik 2007). In some areas, *Eutreptiella braarudii* alone can  
112 make up to 46% of the phytoplankton population (Stonik, 2007). As primary producers, these  
113 algae are important in energy flow and nutrient cycling in the coastal marine ecosystem.

114 Meanwhile, as solar energy converters, these algae are potentially candidates of biofuel species.

115 In this study, we used 454 high-throughput sequencing to study transcriptomic profiles  
116 and gas chromatography-tandem mass spectrometry (GC/MS/MS) to identify fatty acids  
117 produced under phosphate-depleted and phosphate-replete conditions, and conducted reverse-  
118 transcription qPCR (RT-PCR) to quantify expression of several key enzyme coding genes to  
119 investigate molecular mechanisms that regulate lipid biosynthesis in *Eutreptiella* sp.

120

121 **Materials and Methods**

122 ***Culture preparation and RNA isolation.*** Two sets of cultures were maintained in phosphate-  
123 depleted medium (to produce high-lipid culture) and phosphate-replete f/2 medium (to produce  
124 low-lipid culture); cells were harvested, total RNA and mRNA were isolated as reported  
125 previously (Kuo et al. 2013)

126 ***Lipid measurement.*** Nile Red (9-diethylamino-5H-benzo- $\alpha$ -phenoxazine-5-one, a lipid-soluble  
127 fluorescent probe) staining was used to measure relative abundance of neutral lipids as reported  
128 (Lee et al., 1998, Hu *et al.*, 2008). Forty  $\mu$ l of Nile Red solution in acetone (250 mg/l) were  
129 added to 10 ml of algal suspension at room temperature for 10 min. A spectrophotometer  
130 (HITACHI, Tokyo, Japan) was then used to measure the fluorescence with excitation at the  
131 wavelength of 490 nm and emission in the wavelength band of 580 to 590 nm, as reported in  
132 Kuo and Lin (2012).

133 ***Lipid extraction and fatty acid identification by gas chromatography-tandem mass***  
134 ***spectrometry (GC/MS/MS).*** A gravimetric method was applied to determine actual lipid contents  
135 by using chloroform-methanol method according to Bligh and Dyer (1959). In short, lipids were  
136 extracted from freeze-dried cells with chloroform/methanol (1:2, v/v) and the residue was  
137 extracted one more time with 1:1 chloroform/methanol. The chloroform layer was collected and  
138 evaporated under a gentle flow of nitrogen gas. Derivatization for GC/MS/MS analysis followed  
139 the method summarized by (Carvalho and Malcata 2005). Briefly, samples were dissolved in 1  
140 ml of a freshly prepared mixture of dry acetyl chloride and methanol, at a ratio of 5:100 (v/v),  
141 and kept at 100 °C under pure nitrogen for 1 h. After cooling, 1 ml of hexane was added and  
142 mixed by vortexing. Purification of the solution was achieved by adding 1 ml of saturated  
143 sodium chloride solution. The prepared solution of fatty acid methyl esters was filtered using

144 0.45 µm Millipore filter. Analysis of the solution was performed on a Waters Quattro Micro  
145 GC/MS/MS system equipped with a Rxi-5Sil MS column (30 m x 0.25 mm, 0.25 µm film  
146 thickness, Restek Co., PA). Helium was used as the carrier gas with a flow rate of 1 ml/min.  
147 Initial oven temperature was 70 °C for 1 min and the temperature gradient was 5 °C/min from  
148 70 °C to 270 °C with no holding time. Sample was introduced in splitless injection mode.  
149 Injector temperature was 270 °C and purged for 1 min with a purge flow of 25 ml/min. Total run  
150 time was 41 min. The MS source temperature was set at 250 °C and the GC interface was  
151 275 °C. A fatty acids methyl ester mixture (FAMQ-005 FAME Reference Standard,  
152 AccuStandard Inc., CT, USA) was used as external standards. The mass spectrum and the  
153 corresponding retention time of each component were exported to NIST MS Search 2.0 software  
154 to identify compounds by means of library and standard comparisons.

155 **454 sequencing of the *SL*-based transcriptomes.** mRNA samples isolated as described above  
156 from the four culture conditions were used to synthesize cDNA, which was subsequently used  
157 for 454 sequencing as reported previously (Kuo et al. 2013). Briefly, a modified random oligo  
158 named 454AT<sub>7</sub>N<sub>9</sub> (5'-  
159 CGTATCGCCTCCCTCGCGCCATCAGTAATACGACTCACTATAGGGAGNNNNNNNNN-  
160 3', where N is any of the 4 nucleotides) was used to synthesize the 1st strand cDNAs. The  
161 cDNAs were then used as templates for PCR amplification of the 5'-end of the cDNAs of the  
162 *trans*-spliced transcripts using ExTaq with a *Eutreptiella* spliced leader-based primer  
163 454BEutSL, 5'-  
164 GAGACTATGCGCCTTGCCAGCCCGCTCAGACACTTTCTGAGTGTCTATTTCTTTTCG-  
165 3'), paired with 454AT<sub>7</sub> (5'-  
166 CGTATCGCCTCCCTCGCGCCATCAGTAATACGACTCACTATAGGGAG-3'). After PCR

167 we selected the amplicons from agarose gel in the size range of 300-700 bp as the template for  
168 emulsion PCR (emPCR) using GS Titanium SV emPCR Kit. Sequencing was carried out using  
169 GS Titanium Sequencing Kit on the GS FLX System at the Center for Applied Genetics and  
170 Technology, University of Connecticut.

171 ***Sequence processing and annotation.*** Sequence reads were processed and analyzed as recently  
172 reported (Kuo et al. 2013). In short, raw sequencing reads from all of the 4 samples were pooled  
173 together and trimmed using CLC Genomics Workbench (CLC Bio, Aarhus, Demark). After  
174 quality and primer trimming, sequences shorter than 150 nt were discarded. In order to filter off  
175 454 sequencing errors and create reduced-redundancy sequence dataset, USEARCH (Edgar  
176 2010) was used for sequence clustering. The resulting unique transcripts were then annotated  
177 using Blast2Go V.2.5.0 (Götz et al. 2008) against NCBI's non-redundant (nr) database using  
178 BLASTx algorithm (Altschul et al. 1990), with a cut-off-E-value  $\leq 10^{-3}$ .

179 ***Reverse-transcription quantitative PCR (RT-qPCR).*** In order to further investigate the  
180 expression patterns of genes potentially regulating lipid production in *Eutreptiella*, some of the  
181 genes identified from the transcriptomic data as related to carbon fixation and lipid synthesis  
182 were selected and further analyzed by RT-qPCR. First strand cDNA libraries were prepared by  
183 the methods mentioned earlier. It is suggested that at least two reference genes are needed for  
184 proper normalization of gene expression levels (Guo and Ki 2012, Vandesompele et al. 2002).  
185 Tubulin, actin, and elongation factor 1 $\alpha$  were selected as candidates, as they had been shown to  
186 be good reference genes in some microalgae and plants (Guo and Ki 2012, Le Bail et al. 2008).  
187 We used the geometric average of the expression levels of these reference genes to normalize the  
188 measured expression levels of target genes as reported (Vandesompele et al. 2002). For each  
189 gene investigated, two sets of primers were designed (Table 3). To prepare standards, the primer



190 combination that specifies longer gene fragment was used to PCR amplify each target gene from  
191 *Eutreptiella* cDNA. The amplicons of the target genes were checked with gel electrophoresis to  
192 assure the absence of primer dimmers and then purified using DNA Clean & Concentrate™  
193 column (Zymo Research, Orange, CA). The purified DNA was serially diluted to 10<sup>2</sup>, 10<sup>3</sup>, 10<sup>4</sup>,  
194 10<sup>5</sup>, and 10<sup>6</sup> gene copies to generate standard curves to analyze the amplification efficiency and  
195 primer specificity for every primer pair. qPCR was performed using the iCycler iQ™ real-time  
196 PCR Detection System (Bio-Rad Laboratories, Inc., Hercules, CA) with SYBR Green supermix.  
197 The qPCR reactions included a single denaturation cycle of 95 °C for 3 min, 40 cycles of 95 °C  
198 for 20 sec, 58 °C for 30 sec, and 72 °C for 15 sec, followed by a melt curve analysis from 55 to  
199 100 °C.

## 200 **Results**

201 ***Physiological conditions of the cultures.*** Two sets of cultures were grown under phosphate-  
202 depleted (to produce high-lipid culture) and phosphate-replete (to produce low-lipid culture)  
203 conditions. On the 11th day, the phosphate-replete cultures were in exponential growth phase  
204 whereas phosphate-depleted cultures already reached stationary phase. When normalized to per  
205 cell basis, the lipid contents of the cultures grown in phosphate-depleted medium were about 2-  
206 fold higher than that of the cultures grown in phosphate-replete medium (Figure 1). This  
207 observed difference in lipid content prompted cell harvesting from both cultures in the light and  
208 dark periods, which yielded four samples referred to as high-lipid-light, high-lipid-dark, low-  
209 lipid-light, and low-lipid-dark cultures.

210 ***Comparison of gene diversity among samples.*** The four samples were subjected to RNA  
211 extraction, cDNA library construction, and 454 sequencing (Kuo et al. 2013). The Venn diagram  
212 in Figure 2 summarizes the numbers of unique genes, total genes and shared genes among the 4

213 cDNA libraries. The analysis revealed that each library contained different numbers of total  
214 genes as well as different unique genes that were not shared by any other libraries. Between the  
215 two light cultures, the high-lipid cultures had more unique genes and total genes. Between the  
216 cultures in the same lipid content categories, cultures harvested under the light condition  
217 displayed more unique genes (i.e. light-specific) and total genes. Overall, high-lipid-light  
218 cultures expressed the highest number of unique and total genes among the 4 samples,  
219 suggesting that a more complex system was involved in lipid production and light reaction in  
220 *Eutreptiella* sp.

221 **Fatty acid synthesis.** Based on the functional annotation, we have identified genes encoding key  
222 enzymes involved in the lipid biosynthesis and catabolism (Table 1). Fatty acid biosynthesis  
223 from acetyl-CoA involved in two enzymes: ACCase and FAS. Eukaryotic type ACCase (72%  
224 identical to ACCase of *Thalassiosira pseudonana*; GenBank accession number: XP\_002296083)  
225 and type I FAS (67% identical to FASI of *Caenorhabditis elegans*; NP\_492417) were found in  
226 our dataset. Figure 3 illustrates a potential lipid biosynthesis pathway of *Eutreptiella* sp. ACCase  
227 catalyzes carboxylation of acetyl-CoA to produce malonyl-CoA, which is catalyzed to malonyl-  
228 ACP by malonyl-CoA transacylase. Next, long-chain saturated fatty acids are synthesized by  
229 type I fatty acid synthase, which have 7 active sites within a single large polypeptide complex  
230 (Nelson and Cox, 2008). The active enzyme domains include  $\beta$ -ketoacyl-ACP synthase (KAS),  
231 malonyl/acetyl-CoA-ACP transferase (MAT),  $\beta$ -hydroxyacyl-ACP dehydratase (HAD), enoyl-  
232 ACP reductase (EAR),  $\beta$ -ketoacyl-ACP reductase (KAR), and Acyl-ACP thioesterase (TE).  
233 Synthesized palmitate (C16:0) and stearate (C18:0) via the activity of FASI are further subjected  
234 to elongation, desaturation, or other modifications (see next section for more details). Besides  
235 FASI, individual genes encoding  $\beta$ -ketoacyl-ACP reductase and Acyl-ACP thioesterase related

236 to type II fatty acid synthase (FASII) were also identified (Table 1). Malonyl-CoA transacylase,  
237 which functions in the fatty acid synthesis pathway in other plants, was missing in our dataset.  
238 ***Fatty acid identification and biosynthesis pathways.*** The stepwise desaturation and elongation  
239 of C18 acid lead to the extension of fatty acids and synthesis of unsaturated fatty acids (Nelson  
240 and Cox, 2008). The major fatty acids found in *Eutreptiella* sp. were the very long chain  
241 polyunsaturated fatty acids, docosahexaenoic acid (DHA, 22:6n-3). Various desaturases and  
242 elongases were found in our study (Table 1), including  $\Delta 5$  desaturase,  $\Delta 6$  desaturase,  $\Delta 8$   
243 desaturase,  $\Delta 9$  desaturase,  $\Delta 12$  desaturase and  $\Delta 15$  desaturase. The elongases were:  $\Delta 5$  elongase,  
244  $\Delta 6$  elongase, and  $\Delta 9$  elongase.

245 In order to link the identified genes to their expected roles in *Eutreptiella* sp., the fatty  
246 acid (FA) profiles of *Eutreptiella* sp. were analyzed by screening C16-C24 fatty acids via  
247 GC/MS/MS. We identified 24 fatty acids (including C16, C20, C22, and C24 fatty acids) from  
248 the cultures of *Eutreptiella* sp. (Figure 4 and Table 2). In both of the phosphate-depleted and  
249 phosphate-replete cultures, *Eutreptiella* sp. was relatively rich in polyunsaturated fatty acids  
250 (PUFAs), especially very long chain polyunsaturated  $\omega 3$  fatty acids (VLCPPFA),  
251 docosahexaenoic acid (DHA, 22:6) and eicosapentaenoic acid (EPA, 20:5). DHA had the highest  
252 amount in both cultures (Figure 4), so we used it as a standard to estimate relative abundance of  
253 other fatty acids (Table 2). Trace amount of tetracosahexaenoic acid, a C24 VLCPPFA, was  
254 found. Three saturated fatty acids, palmitic acid (16:0), stearic acid (18:0), and behenic acid  
255 (20:0), were also identified. The abundance of saturated fatty acids was relatively low in the  
256 phosphate-depleted cultures. The analysis also revealed the presence of C16 unsaturated fatty  
257 acids: 7-hexadecenoic acid (16:1), 9-hexadecenoic acid (16:1), 7,10-hexadecadienoic acid  
258 (16:2), 7, 10, 13-hexadecatrienoic acid (16:3), and 4, 7, 10, 13-hexadecatetraenoic acid (16:4) in

259 both of the cultures. In the phosphate-depleted cultures, the relative abundance of C16 and C18  
260 fatty acids was lower than the fatty acids in the phosphate-replete cultures (Figure 4 and Table  
261 2), suggesting that phosphate availability in the culture medium affected the lipid composition in  
262 *Eutreptiella* sp.

263 Based on the transcriptome and GC/MS/MS results, *Eutreptiella* sp. is predicted to be  
264 capable of producing various intermediates via  $\omega 3$  and  $\omega 6$  pathways, as well as producing  
265 VLCPPFA EPA and DHA by using the  $\Delta 8$  alternative pathway, as reported in *Euglena* (Meyer et  
266 al. 2003; Qi et al. 2004; Wallis and Browse 1999). Figure 5 shows the potential fatty acid  
267 elongation pathways for *Eutreptiella* sp. as constructed from the transcriptome results. The first  
268 desaturation for unsaturated fatty acids synthesis is catalyzed by  $\Delta 9$  desaturase to introduce a  
269 double bond into stearic acid resulting in 18:1 -ACP. Then a series of elongation and  
270 desaturation takes place to produce the 24 types of unsaturated fatty acid mentioned before  
271 (Figure 5). The elongation procedure is terminated when the acyl group is removed by acyl-ACP  
272 thioesterase (TE) or oleoyl-ACP hydrolase (OAH), or when the fatty acids are transferred to the  
273 biosynthesis of triacylglycerol.

274 **Triacylglycerol (TAG) biosynthesis.** Microalgal TAG biosynthesis is proposed to take place via  
275 transfer of fatty acids from CoA to glycerol-3-phosphate using the direct glycerol pathway  
276 (Ratledge 1988). However, the existing knowledge on the pathways and enzymes involved in  
277 TAG biosynthesis in most of the microalgae (e.g. euglenophytes) are limited. In this study, four  
278 transcripts coding for the enzymes involved in TAG biosynthesis were found in our *Eutreptiella*  
279 sp. transcriptomic dataset. They were glycerol 3-phosphate dehydrogenase (GPD), glycerol 3-  
280 phosphate acyltransferase (GPAT), and acylglycerophosphate acyltransferase (AGPAT) (Table 1).

281 For TAG biosynthesis, the precursor glycerol 3-phosphate is produced during glycolysis from  
282 dihydroxyacetone phosphate by the action of glycerol 3-phosphate dehydrogenase.

283 Based on the data, a potential pathway for *Eutreptiella* sp. TAG biosynthesis is proposed  
284 (Figure 3). The first step is the acylation of the two hydroxyl groups of glycerol3-phosphate by  
285 two fatty acyl-CoA to yield phosphatidic acid, which is hydrolyzed by phosphatidate  
286 phosphatase to form 1,2 diacylglycerol. Diacylglycerols are then converted to triacylglycerols by  
287 transferring a third fatty acyl-CoA. Phosphatidic acid phosphohydrolase (PAP) and  
288 diacylglycerol acyltransferase (DGAT) were missing in our cDNA libraries.

289 ***Gene expression levels as measured using reverse transcription quantitative PCR.*** We further  
290 confirmed the differential expression patterns of several genes using reverse transcription  
291 quantitative PCR (RT-qPCR). Nine genes involved in lipid synthesis were chosen for the  
292 analysis, including type I fatty acid synthase (FASI), 3 different types of  $\beta$ -ketoacyl-ACP  
293 reductase (KAR1, KAR2, KAR3, 12-33% identity at amino acid level), acetyl-CoA carboxylase  
294 (ACCase), acyl carrier protein (ACP), thioesterase (TE),  $\Delta 8$  desaturase, and an unclassified fatty  
295 acid desaturase (FAD). Seven of the nine genes, KAR2, KAR3, FAD, ACCase, ACP,  $\Delta 8$ , and  
296 TE had higher expression levels in the high-lipid-light cultures (Figure 6 and Figure 7). The  
297 expression of FASI showed an opposite trend between high-lipid and low-lipid cultures. In high-  
298 lipid cultures, FASI was expressed at a higher level in the light period, whereas in the low-lipid  
299 cultures, FASI was expressed at a lower level in the light period (Figure 6). As for genes  
300 involved in triacylglycerol synthesis, glycerol 3-phosphate dehydrogenase (GPD) and 1-acyl-sn-  
301 glycerol3-phosphate o-acyltransferase (AGPAT) exhibited slightly higher expression (transcript  
302 abundance) in high-lipid-light cultures (Figure 7).

303 We also examined the expression of genes potentially involved in carbon fixation in  
304 *Eutreptiella* sp.: phosphoenolpyruvate carboxylase (PEPCase), 2 variants of  
305 phosphoenolpyruvate carboxykinase (PEPCK1 and PEPCK2, 54% identical at amino acid level),  
306 pyruvate-phosphate dikinase (PPDK), and phosphoribulokinase (PRK). Three out of the five  
307 genes (i.e. PPDK, PRK, and PEPCK1) showed positive correlation of transcript abundance with  
308 lipid production. In particular, PEPCK1 and PRK expression levels in the high-lipid-light  
309 cultures were over 6- and 4-fold higher than in the low-lipid-light cultures, respectively (Figure  
310 8).

311

## 312 **Discussion**

313 ***Unique lipid and fatty acid production patterns.*** While the effects of depleting nitrate on lipid  
314 production has been studied in many algae (Griffiths and Harrison 2009, Hu et al. 2008), effects  
315 of phosphate are less documented. Our preliminary experiments showed that phosphate depletion  
316 more strongly promotes lipid content in *Eutreptiella* sp. cells than nitrate depletion (data not  
317 shown). The study reported here also showed that phosphate stress markedly increased  
318 *Eutreptiella* lipid content. Among the cultures grown in parallel, lipid content was 2 fold as  
319 much in the phosphate-depleted cultures as that in the phosphate-replete, *f*/2 medium-grown,  
320 cultures (Figure 1). The type of main energy reserve (carbohydrates or lipids) in algae depends  
321 on which carbon fixation product is utilized in the Calvin-Benson cycle. Among those products,  
322 hexose phosphates are used in the synthesis of carbohydrates, while 3-phosphoglycerate is used  
323 for lipid synthesis (Raven 1974). In addition, the availability of inorganic nitrogen influences  
324 carbon partition (Huppe and Turpin 1994, Raven 1974). The presence of inorganic nitrogen

325 source favors 3-phosphoglycerate and increases the flux of photosynthetically fixed carbon into  
326 citrate cycle (Raven 1974), which is one of the sources for acetyl CoA (Nelson and Cox 2008).  
327 Interestingly, *Eutreptiella* sp. has abundant polyunsaturated fatty acids. DHA was the  
328 most abundant fatty acid from both the phosphate-depleted and phosphate-replete cultures.  
329 Polyunsaturated fatty acids are valuable for cold adaptation (Wallis et al. 2002 and references  
330 therein). The relatively high abundance of unsaturated fatty acids in *Eutreptiella* sp. may be due  
331 to the adaptation to their native environment in Long Island Sound, where the temperature  
332 reaches down below in the winter although there has been a warming trend (Snyder et al. 2019).  
333 All the fatty acids that we identified in this study have also been reported in *Euglena gracilis*  
334 (Hulanicka et al. 1964, Korn 1964, Meyer et al. 2003), except C24:1 and C24:6 fatty acids.  
335 Different from *E. gracilis*, *Eutreptiella* sp. has a very high proportion of very long chain  
336 unsaturated fatty acids (C22 and longer, i.e. DHA and EPA), rendering this species to be of high  
337 nutritional value for zooplankton and other heterotrophic organisms in the marine ecosystem.  
338 Moreover, the proportions of saturated fatty acids (i.e. C16:0, C18:0, and C20:0) and unsaturated  
339 C16 and C18 fatty acids decreased when phosphate was depleted (Figure 4 and Table 2),  
340 suggesting that it is possible to enhance the production of desired components of fatty acids from  
341 *Eutreptiella* sp. by manipulating nutrient composition in the culture medium. Although it is not  
342 clear why the abundance of C16:0 and C16:4 fatty acids were much lower in the phosphate-  
343 depleted cultures, phosphate stress might alter the composition of fatty acids in the algal cells, as  
344 plants and algae can respond to stress by adjusting membrane fluidity and by releasing  
345 unsaturated fatty acids from the membrane (Maréchal et al. 1997, Upchurch 2008).  
346

347 ***Expressed genes linked to lipid synthesis in Eutreptiella sp.*** Fatty acids are synthesized via two  
348 enzyme systems, ACCase and FAS (Nelson and Cox 2008). ACCase plays a critical role in  
349 regulating fatty acid synthesis and is essential for lipid metabolism as it catalyzes the first step of  
350 fatty acid synthesis and is found in all kingdoms of life except archaea (Cronan Jr and Waldrop  
351 2002, Harwood 1988). It comprises three functional constituents: biotin carrier protein, biotin  
352 carboxylase, and transcarboxylase, and differentiates into two distinct types: one consisting of  
353 three separate subunits (prokaryote-type), and the other being a single multi-domain  
354 multifunctional polypeptide (eukaryote-type) (Sasaki et al. 1995). The eukaryote-type occurs in  
355 mammals, fungi or yeast, while both the prokaryote- and the eukaryote- type can be found in  
356 plants (Huang et al. 2002, Sasaki et al. 1995). The ACCase sequences found in our dataset shares  
357 ~72% amino acid identity to an eukaryotic type in the diatom *Thalassiosira pseudonana*,  
358 suggesting that *Eutreptiella sp.* ACCase is also an eukaryotic type. In the qPCR analysis,  
359 ACCase showed highest expression level in the high-lipid-light cultures, indicating that this gene  
360 is related to photosynthetic lipid production in *Eutreptiella sp.*

361 Our results suggest that *Eutreptiella sp.* may have both type I fatty acid synthase (FASI)  
362 and type II fatty acid synthase (FASII), which are the two major types of fatty acid synthases that  
363 naturally occur in different groups of organisms (Nelson and Cox 2008). FASI, found in  
364 vertebrate and fungi, is a single multifunctional polypeptide with 7 active sites, whereas FASII,  
365 found in plants and bacteria, compose discrete and freely diffusible enzymes. Interestingly,  
366 *Euglena gracilis*, which is another euglenoid species, has different types of fatty acid synthesis  
367 pathways and enzymes to synthesize lipids under different environmental conditions (Delo et al.  
368 1971, Goldberg and Bloch 1972, Inui et al. 1984). ACP-dependent FASI is located in the cytosol  
369 and mainly produces C16 fatty acids (Goldberg and Bloch 1972). When grown in the light, *E.*



370 *gracilis* utilizes ACP-dependent FAS II in plastids to produce fatty acids (Ernst-Fonberg and  
371 Bloch 1971). Inui et al. (1984) also reported a malonyl-CoA independent fatty acid synthesis  
372 system to form wax ester from paramylon as energy storages in *E. gracilis* under anaerobic  
373 conditions. We found genes coding for FASI and for  $\beta$ -ketoacyl-ACP reductase and Acyl-ACP  
374 thioesterase of FASII in *Eutreptiella* sp. Our failure to retrieve the rest of the FASII gene  
375 complex from our cDNA libraries could be due to their being plastid-coded genes, which would  
376 not contain Eut-SL that we used to construct the cDNA libraries, or just simply because they  
377 were not expressed. Whether *Eutreptiella* sp. contains the other type of ACP-dependent FAS  
378 similar to that in *E. gracilis* remains to be further investigated in the future.

379         Based on the fatty acid composition and possession of genes coding for enzymes  
380 involved in fatty acid elongation and desaturation in *Eutreptiella* sp., it is evident that the  $\omega$ 3,  $\omega$ 6  
381 and alternative  $\Delta$ 8 pathways occur in the euglenoid algae. Different from most of plants and most  
382 algae, we found that *Eutreptiella* is similar to *Euglena* in using  $\Delta$ 8 desaturase to introduce the  
383 third double bond on 20:2 (11, 14) to form 20:3 (8, 11, 14) (Meyer et al. 2003, Qi et al. 2004).  
384 The 20:3 fatty acid is then converted to 22:5 EPA via stepwise  $\Delta$ 5 desaturase,  $\Delta$ 5 elongase and  
385  $\Delta$ 4 desaturase (Figure 5). In order to produce DHA, *Eutreptiella* may also utilize another  $\Delta$ 8  
386 pathway to introduce the 4<sup>th</sup> double bound on 20:3 (11,14,17), resulting in 20:4 (8,11,14,17) for  
387 later stepwise process of elongation and desaturation. Although  $\Delta$ 4 desaturase was not identified  
388 in our dataset, it is very likely that *Eutreptiella* sp. has this gene since it was identified and  
389 involved in DHA synthesis in *E. gracilis* (Meyer et al. 2003). In our study, both EPA would need  
390  $\Delta$ 4 desaturase to form their last double bond. We also detected trace amount of 15-tetracosenoic  
391 acid (24:1) and 6,9,12,15,18,21-tetracosahexaenoic acid (24:6). The 24:6 fatty acid can be found  
392 in some algae (Mansour et al. 2005), but the synthesis pathway is not well studied. We proposed

393 that the 24:6 fatty acid could potentially be synthesized by elongation from DHA or elongation  
394 and desaturation from other C22 fatty acids.

395 The 16:4 (4,7,10,13) fatty acid was also abundant in phosphate-replete cultures of  
396 *Eutreptiella* sp. Highly unsaturated stearidonic acid (18:4) and hexadecatetraenoic acid (16:4) are  
397 produced in some macroalgae (Dembitsky et al. 1991, Ishihara et al. 2000) and microalgae  
398 (Wallis and Browse 1999). In diatoms, the phytoplankton accounting for about 40% of algal  
399 primary production, the most common fatty acids range from C14:0 to C22:6, with the most  
400 common number of double bonds two to three and rarely more than 6 (Yi et al. 2017).

401 Unsaturated C16 fatty acids have been identified in *E. gracilis*, the close relative of *Eutreptiella*  
402 sp. (Constantopoulos and Bloch 1967). Increasing light intensity can enhance the production of  
403 16:4 acid and 18:3  $\alpha$ -linolenic acid in *E. gracilis* (Constantopoulos and Bloch 1967). Korn  
404 (1964) suggested a possible C16 pathway for *E. gracilis*: 16:1 (7)  $\rightarrow$  16:2 (7, 10)  $\rightarrow$  16:3 (7, 10,  
405 13)  $\rightarrow$  16:4 (4, 7, 10, 13). Although we identified 16:4 (4, 7, 10, 13) in *Eutreptiella* sp., the genes  
406 responsible for the synthesis of this abundant fatty acid remain uncertain.

407  
408 ***Regulation of genes associated with lipid production.*** Our RT-qPCR revealed that many of the  
409 genes examined had different expression levels between the dark and light periods. Genes  
410 involved in high lipid biosynthesis showed higher expression levels under light condition,  
411 suggesting that these genes promoted lipid production in *Eutreptiella* sp. during photosynthesis.  
412 Those genes were ACCase, ACP, KAR2, KAR3, FAD,  $\Delta$ 8 desaturase, TE, AGPAT, and GPD.  
413 The results of RT-qPCR verified our physiological observation from a 24h diel experiment,  
414 showing that lipids in *Eutreptiella* sp. cells start to accumulate during the light period after cells  
415 have actively divided (Kuo and Lin, 2013). Other evidence showed that the activity of ACCase is

416 correlated to that of the Calvin-Benson Cycle enzymes, with the greatest activities under light  
417 (Sasaki et al. 1997) and negligible in the dark (Bao et al. 2000).

418 Three genes encoding carbon fixation enzymes showed higher expression levels under  
419 the high-lipid-light condition, indicating that those enzymes are related to the biosynthesis of  
420 precursors for lipid production. Phosphoribulokinase (PRK) and one copy of  
421 phosphoenolpyruvate carboxykinase (i.e. PEPCK1) exhibited the highest level of relative gene  
422 expression among these genes. PEPCK activity is linked to CO<sub>2</sub> fixation in algae (Reiskind and  
423 Bowes 1991). It converts oxaloacetate into CO<sub>2</sub> and phosphoenolpyruvate, bridging C4 to C3  
424 pathway in providing CO<sub>2</sub> for photosynthesis. It is noteworthy that C4 enzymes have been  
425 identified in this species (Kuo et al. 2013). The phosphoenolpyruvate can later be converted into  
426 pyruvate, which is an important precursor for Acetyl-CoA. PRK catalyzes the reaction of ATP  
427 and ribulose 5-phosphate to produce ADP and ribulose 1,5-bisphosphate, the substrate needed to  
428 capture CO<sub>2</sub> in photosynthesis. The concomitant up-regulation of the fatty acid synthesis and  
429 photosynthesis genes suggests the linkage of the two carbon metabolic processes.

430

### 431 **Acknowledgements**

432 We thank the Center of Environmental Science and Engineering at UConn for providing the  
433 facility of GC/MS/MS, and Yunyun Zhuang for helping with 454 sequencing. The research was  
434 supported by the Predoctoral Awards of the Department of Marine Sciences at UConn (to RCK),  
435 Multidisciplinary Environmental Research Award from the Center of Environmental Science and  
436 Engineering at UConn (to RCK), and National Science Foundation “Assembling the Tree of Life  
437 (AToL)” grant EF-0629624 (to SL and collaborators). All the authors declare no conflict of  
438 interest existing in this work.

439

## 440 **References**

- 441 Altschul, S. F., Gish, W., Miller, W., Myers, E. W. & Lipman, D. J. 1990. Basic local alignment  
442 search tool. *J. Mol. Biol.* 215:403-10.
- 443 Álvarez-Góngora, C. & Herrera-Silveira J. A. 2006. Variations of phytoplankton community  
444 structure related to water quality trends in a tropical karstic coastal zone. *Mar. Pollut.*  
445 *Bull.* 52:48-60.
- 446 Anderson, D. M., Hoagland, P., Kaoru, Y. & White, A. W. 2000. Estimated annual economic  
447 impacts from harmful algal blooms (HABs) in the Unites States. WHOI-2000-11 Woods  
448 Hole Oceanogr Inst, Woods Hole, Massachusetts.  
449 [http://www.whoi.edu/redtide/pertinentinfo/Economics\\_report.pdf](http://www.whoi.edu/redtide/pertinentinfo/Economics_report.pdf).
- 450 Arzel J., Martinez Lopez, F. X., Métailler, R., Stéphane, G., Viau, M., Gandemer, G. &  
451 Guillaume, J. 1994. Effect of dietary lipid on growth performance and body composition  
452 of brown trout (*Salmo trutta*) reared in seawater. *Aquaculture* 123:361-75.
- 453 Bao, X., Focke, M., Pollard, M. & Ohlrogge, J. 2000. Understanding in vivo carbon precursor  
454 supply for fatty acid synthesis in leaf tissue. *The Plant J.* 22:39-50.
- 455 Bates, S. S., Strain & P. M. 2006. Nutrients and phytoplankton in Prince Edward Island Inlets  
456 during late summer to fall: 2001-2003. *Canadian Technical Report of Fisheries and*  
457 *Aquatic Sceicnes* 2668: xii + 136 p.
- 458 Bloch, K. & Vance, D. 1977. Control mechanisms in the synthesis of saturated fatty acids. *Annu.*  
459 *Rev. Biochem.* 46:263-98.
- 460 Carvalho, A. P. & Malcata F. X. 2005. Preparation of fatty acid methyl esters for gas-  
461 chromatographic analysis of marine lipids: insight studies. *J. Agric. Food Chem.*  
462 53:5049-59.
- 463 Constantopoulos, G. & Bloch, K. 1967. Effect of Light Intensity on the Lipid Composition of  
464 *Euglena gracilis*. *J. Biol. Chem.* 242:3538-42.
- 465 Cossins, A. R., Friedlander, M. J. & Prosser, C. L. 1977. Correlations between behavioral  
466 temperature adaptations of goldfish and the viscosity and fatty acid composition of their  
467 synaptic membranes. *J. Comp. Physiol. A Neuroethol. Sens. Neural. Behav. Physiol.*  
468 120:109-21.
- 469 Cronan, J. E. & Waldrop, G. L. 2002. Multi-subunit acetyl-CoA carboxylases. *Prog. Lipid Res.*  
470 41:407-35.
- 471 Delo, J., Ernst-Fonberg, M. L. & Bloch, K. 1971. Fatty acid synthetases from *Euglena gracilis*.  
472 *Arch. Biochem. Biophys.* 143:384-91.
- 473 Dembitsky, V. M., Pechenkina-Shubina, E. E. & Rozentsvet, O. A. 1991. Glycolipids and fatty  
474 acids of some seaweeds and marine grasses from the black sea. *Phytochemistry* 30:2279-  
475 83.
- 476 Edgar, R. C. 2010. Search and clustering orders of magnitude faster than BLAST. *Bioinformatics*  
477 26:2460-1.
- 478 Ernst-Fonberg, M. L & Bloch, K. 1971. A chloroplast-associated fatty acid synthetase system in  
479 *Euglena*. *Arch. Biochem. Biophys.* 143:392-400.
- 480 Goldberg, I. & Bloch, K. 1972. Fatty acid synthetases in *Euglena gracilis*. *J. Biol. Chem.*  
481 247:7349-57.

- 482 Götz, S., García-Gómez, J. M., Terol, J., Williams, T. D., Nagaraj, S. H., Nueda, M. J., Robles,  
483 M., Talón, M., Dopazo, J. & Conesa, A. 2008. High-throughput functional annotation and  
484 data mining with the Blast2GO suite. *Nucleic Acids Res* 36:3420-35.
- 485 Gouveia, L. & Oliveira, A. 2009. Microalgae as a raw material for biofuels production. *J. Ind.*  
486 *Microbiol. Biotechnol.* 36:269-74.
- 487 Griffiths, M. & Harrison, S. 2009. Lipid productivity as a key characteristic for choosing algal  
488 species for biodiesel production. *J. Appl. Phycol.* 21:493-507.
- 489 Gunstone, F. D., Harwood, J. L. & Dijkstra A. J. 2007. *The Lipid Handbook*, 3rd ed. CRC Press,  
490 Taylor & Francis Group, FL, USA. pp. 791.
- 491 Guo, R. & Ki, J. S. 2012. Evaluation and validation of internal control genes for studying gene  
492 expression in the dinoflagellate *Prorocentrum minimum* using real-time PCR. *Eur. J.*  
493 *Protistol.* 48(3):199-206.
- 494 Guschina, I. A & Harwood, J. L. 2006. Lipids and lipid metabolism in eukaryotic algae. *Prog*  
495 *Lipid Res* 45:160-86.
- 496 Harwood, J. L. 1988. Fatty acid metabolism. *Annu. Rev. Plant Physiol. Plant Mol. Biol.* 39:101-  
497 38.
- 498 Henriksen, P., Riemann, B., Kaas, H., Sørensen, H. M. & Sørensen, H. L. 2002. Effects of  
499 nutrient-limitation and irradiance on marine phytoplankton pigments. *J. Plankton Res.*  
500 24:835-58.
- 501 Hu, Q., Sommerfeld, M., Jarvis, E., Ghirardi, M., Posewitz, M., Seibert, M. & Darzins, A. 2008.  
502 Microalgal triacylglycerols as feedstocks for biofuel production: perspectives and  
503 advances. *The Plant J.* 54:621-39.
- 504 Huang, S., Sirikhachornkit, A., Faris, J. D., Su, X., Gill, B. S., Haselkorn, R. & Gornicki, P.  
505 2002. Phylogenetic analysis of the acetyl-CoA carboxylase and 3-phosphoglycerate  
506 kinase loci in wheat and other grasses. *Plant Mol. Biol.* 48:805-20.
- 507 Hulanicka, D., Erwin, J & Bloch, K. 1964. Lipid metabolism of *Euglena gracilis*. *J. Biol. Chem.*  
508 239:2778-86.
- 509 Huppe, H. C. & Turpin, D. H. 1994. Intergration of carbon and nitrogen metabolism in plant and  
510 algal cells. *Annu. Rev. Plant Physiol. Plant Mol. Biol.* 45:577-607.
- 511 Illman, A. M., Scragg, A. H. & Shales, S. W. 2000. Increase in *Chlorella* strains calorific values  
512 when grown in low nitrogen medium. *Enzyme Microb. Technol.* 27:631-5.
- 513 Inui, H., Miyatake, K., Nakano, Y. & Kitaoka, S. 1984. Fatty acid synthesis in mitochondria of  
514 *Euglena gracilis*. *Eur. J. Biochem.* 142:121-6.
- 515 Ishihara, K., Murata, M., Kaneniwa, M., Saito, H., Komatsu, W. & Shinohara, K. 2000.  
516 Purification of stearidonic Acid (18:4(n-3)) and hexadecatetraenoic Acid (16:4(n-3))  
517 from algal fatty acid with lipase and medium pressure liquid chromatography. *Biosci.*  
518 *Biotechnol. Biochem.* 64:2454-7.
- 519 Jónasdóttir, S. H. 2019. Fatty acid profiles and production in marine phytoplankton. *Mar. Drug.*  
520 17(3):151. doi: [10.3390/md17030151](https://doi.org/10.3390/md17030151).
- 521 Klein Breteler, W. C. M., Koski, M. & Rampen, S. 2004. Role of essential lipids in copepod  
522 nutrition: no evidence for trophic upgrading of food quality by a marine ciliate. *Mar.*  
523 *Ecol. Prog. Ser.* 274: 199-208.
- 524 Korn, E. D. 1964. The fatty acids of *Euglena gracilis*. *J. Lipid Res.* 5:352-62.
- 525 Kuo, R. C & Lin, S. 2012. Ectobiotic and endobiotic bacteria associated with *Eutreptiella* sp.  
526 isolated from Long Island Sound. *Protist* 164 (1):60-74.

- 527 Kuo, R. C., Zhang, H., Zhuang, Y., Hannick, L. & Lin, S. 2013 Transcriptomic study reveals  
528 widespread spliced leader *trans*-splicing, short 5'-UTRs and potential complex carbon  
529 fixation mechanisms in the euglenoid alga *Eutreptiella* sp. *PLoS ONE*. 8(4):e60826.  
530 doi:10.1371/journal.pone.0060826.
- 531 Le Bail, A., Dittami, S., De Franco, P. O., Rousvoal, S., Cock, M., Tonon, T. & Charrier, B.  
532 2008. Normalisation genes for expression analyses in the brown alga model *Ectocarpus*  
533 *siliculosus*. *BMC Mol. Biol.* 9:75.
- 534 Lee S., Yoon, B. D. & Oh, H. M. 1998. Rapid method for the determination of lipid from the  
535 green alga *Botryococcus braunii*. *Biotechnol Tech.* 12:553-6.
- 536 Lindholm, T. 1995. Green water caused by *Eutreptiella gymnastica* (Euglenophyceae) in a  
537 stratified Baltic Sea inlet. In *Lassus, P., Arzul G., Denn EE-L., Gentien, P., Baut CM-L.,*  
538 *[Eds.] Harmful Marine Algae Blooms (Proceedings of the Sixth International*  
539 *Conference on Toxic Marine Phytoplankton)*. Nantes, France. pp. 181-6.
- 540 Liu, Z. Y., Wang, G. C. & Zhou, B. C. 2008. Effect of iron on growth and lipid accumulation in  
541 *Chlorella vulgaris*. *Bioresour. Technol.* 99:4717-22.
- 542 Mansour, M. P., Frampton, D. M. F., Nichols, P. D., Volkman, J. K. & Blackburn, S. I. 2005.  
543 Lipid and fatty acid yield of nine stationary-phase microalgae: Applications and unusual  
544 C24-C28; polyunsaturated fatty acids. *J. Appl. Phycol.* 17:287-300.
- 545 Maréchal, E., Block, M. A., Dorne, A. J., Douce, R. & Joyard, J. 1997. Lipid synthesis and  
546 metabolism in the plastid envelope. *Physiol. Plant* 100:65-77.
- 547 Meyer, A., Cirpus, P., Ott, C., Schlecker, R., Zähringer, U. & Heinz, E. 2003. Biosynthesis of  
548 docosaehaenoic acid in *Euglena gracilis*: biochemical and molecular evidence for the  
549 involvement of a  $\Delta 4$ -fatty acyl group desaturase. *Biochemistry* 42:9779-88.
- 550 Nelson, D. L. & Cox, M. M. 2008. Lipid biosynthesis. In *Nelson, D. L. & Cox, M. M. [Eds.]*  
551 *Lehninger Principles of Biochemistry*. W. H. Freeman and Company, New York, pp.  
552 805-45.
- 553 Olli, K., Heiskanen, A. S. & Seppälä, J. 1996. Development and fate of *Eutreptiella gymnastica*  
554 bloom in nutrient-enriched enclosures in the coastal Baltic Sea. *J. Plankton Res.* 18:1587-  
555 604.
- 556 Qi, B., Fraser, T., Mugford, S., Dobson, G., Sayanova, O., Butler, J., Napier, J. A., Stobart, A. K.  
557 & Lazarus, C. M. 2004. Production of very long chain polyunsaturated omega-3 and  
558 omega-6 fatty acids in plants. *Nat. Biotech.* 22:739-45.
- 559 Rainuzzo, J. R., Reitan, K. I. & Olsen, Y. 1997. The significance of lipids at early stages of  
560 marine fish: a review. *Aquaculture* 155:103-15.
- 561 Ratledge, C. 1988. An overview of microbial lipids. In C Ratledge, SG Wilkinson, eds,  
562 *Microbial Lipids*. Academic Press, New York, pp. 3-21.
- 563 Raven, J. A. 1974. Carbon dioxide fixation. In *Stewart, W. D. P. [Ed.] Algal Physiology and*  
564 *Biochemistry: Biotenical Monographs, Vol 10*. University of California Press, California,  
565 pp. 434-55.
- 566 Reiskind, J. B. & Bowes, G. 1991. The role of phosphoenolpyruvate carboxykinase in a marine  
567 macroalga with C4-like photosynthetic characteristics. *Proc. Natl. Acad. Sci. USA*  
568 88:2883-7.
- 569 Rodríguez-Graña, L., Calliari, D., Conde, D., Sellanes, J. & Urrutia, R. 2008. Food web of a SW  
570 Atlantic shallow coastal lagoon: spatial environmental variability does not impose  
571 substantial changes in the trophic structure. *Mar. Ecol. Prog. Ser.* 362:69-83.

- 572 Sajjadi, B., Chen, W.-Y., Raman, A. A. A. & Ibrahim, S. 2018. Microalgae lipid and biomass for  
573 biofuel production: A comprehensive review on lipid enhancement strategies and their  
574 effects on fatty acid composition. *Renew. Sustain. Energ. Rev.* 97:200-32.
- 575 Sasaki, Y., Konishi, T. & Ngano, Y. 1995. The compartmentation of Acetyl-Coenzyme A  
576 carboxylase in plants. *Plant Physiol.* 108:445-9.
- 577 Sasaki, Y., Kozaki, A. & Hatano, M. 1997. Link between light and fatty acid synthesis:  
578 Thioredoxin-linked reductive activation of plastidic acetyl-CoA carboxylase. *Proc. Natl.*  
579 *Acad. Sci. USA* 94:11096-101.
- 580 Schweizer, E. & Hofmann, J. 2004. Microbial type I fatty acid synthases (FAS): major players in  
581 a network of cellular FAS systems. *Microbiol Mol. Biol. Rev.* 68:501-17.
- 582 Seong, K. A., Jeong, H. J., Kim, S., Kim, G. H. & Kang, J. H. 2006. Bacterivory by co-  
583 occurring red-tide algae, heterotrophic nanoflagellates, and ciliates. *Mar. Ecol. Prog. Ser.*  
584 322:85-97.
- 585 Singh, S. C. 2002. Role of lipids and fatty acids in stress tolerance in cyanobacteria. *Acta.*  
586 *Protozool.* 41:297.
- 587 Snyder, J. T., Whitney, M. M., Dam, H. G., Jacobs, M. W. & Baumann, H. 2019. Citizen science  
588 observations reveal rapid, multi-decadal ecosystem changes in eastern Long Island  
589 Sound. *Mar. Environ. Res.* 146:80-8.
- 590 Stonik, I. 2007. Species of the genus *Eutreptiella* (Euglenophyceae) from Russian waters of  
591 East/Japan Sea. *Ocean Sci. J.* 42:81-8.
- 592 Stonik, I. V. & Selina, M. S. 2001. Species composition and seasonal dynamics of density and  
593 biomass of euglenoids in Peter the Great Bay, Sea of Japan. *Russ. J. Mar. Biol.* 27:174-6.
- 594 Takeyama, H., Kanamaru, A., Yoshino, Y., Kakuta, H., Kawamura, Y. & Matsunaga, T. 1997.  
595 Production of antioxidant vitamins,  $\beta$ -carotene, vitamin C, and vitamin E, by two-step  
596 culture of *Euglena gracilis* Z. *Biotechnol. Bioeng.* 53:185-90.
- 597 Tang, K. W. & Taal, M. 2005. Trophic modification of food quality by heterotrophic protists:  
598 species-specific effects on copepod egg production and egg hatching. *J. Exp. Mar. Biol.*  
599 *Ecol.* 318:85-98.
- 600 Thelen, J. J. & Ohlrogge, J. B. 2002. Metabolic engineering of fatty acid biosynthesis in plants.  
601 *Metab. Eng.* 4:12-21.
- 602 Upchurch, R. 2008. Fatty acid unsaturation, mobilization, and regulation in the response of  
603 plants to stress. *Biotechnol. Lett.* 30:967-77.
- 604 Vandesompele, J., De Preter, K., Pattyn, F., Poppe, B., Van Roy, N., De Paepe, A. & Speleman,  
605 F. 2002. Accurate normalization of real-time quantitative RT-PCR data by geometric  
606 averaging of multiple internal control genes. *Genome Biol.* 3: research0034.0031 -  
607 research0034.0011.
- 608 Wallis, J. G. & Browse, J. 1999. The  $\Delta 8$ -Desaturase of *Euglena gracilis*: an alternate pathway  
609 for synthesis of 20-carbon polyunsaturated fatty acids. *Arch. Biochem. Biophys.* 365:307-  
610 16.
- 611 Wallis, J. G., Watts, J. L. & Browse, J. 2002. Polyunsaturated fatty acid synthesis: what will they  
612 think of next? *Trends Biochem. Sci.* 27:467-73.
- 613 White, S. W., Jie, Z., Yong-Mei, Z. & Rock, C. O. 2005. The structural biology of type II fatty  
614 acid biosynthesis. *Annu. Rev. Biochem.* 74:791-831.
- 615 Worsham, L. M. S., Williams, S. G. & Ernst-Fonberg, M. L. 1993. Early catalytic steps of  
616 *Euglena gracilis* chloroplast type II fatty acid synthase. *Biochimica et Biophysica Acta*  
617 (BBA) - Lipids and Lipid Metabolism 1170:62-71.

- 618 Yamane, Y. I., Utsunomiya, T., Watanabe, M. & Sasaki, K. 2001. Biomass production in  
619 mixotrophic culture of *Euglena gracilis* under acidic condition and its growth energetics.  
620 *Biotechnol. Lett.* 23:1223-8.
- 621 Yi, Z., Xu., M., Di, X., Brynjolfsson, S. & Fu, W. 2017. Exploring valuable lipids in diatoms.  
622 *Front. Mar. Sci.* 4:17. doi: 10.3389/fmars.2017.00017.



## 623 **Figure legends**

624 Figure 1. Growth and lipid production of *Eutreptiella* cultures under phosphate-replete and  
625 phosphate-depleted conditions. (A) Growth curves of *Eutreptiella* cultures. (B) Growth rates and  
626 lipid fluorescence levels at the time when cultures were harvested.

627 Figure 2. Common and unique expressed genes between different culture conditions. HL: high-  
628 lipid-light cultures. HD: high-lipid-dark cultures. LL: low-lipid-light cultures. LD: low-lipid-dark  
629 cultures. Numbers outside the diagram represent total number of genes found in each library.

630 Figure 3. Putative lipid biosynthesis pathway in *Eutreptiella* sp. inferred from our transcriptomic  
631 data. GPD: glycerol 3-phosphate dehydrogenase (EC: 1.1.1.53); GPAT: glycerol-3-phosphate  
632 acyltransferase (EC: 2.3.1.15); AGPAT: acylglycerophosphate acyltransferase (EC: 2.3.1.51);  
633 PP: phosphatidate phosphatase (EC: 3.1.3.4); DGAT: diacylglycerol acyltransferase (EC:  
634 2.3.1.20); FA: fatty acids; FA-CoA: fatty acyl-CoAs. FA: fatty acids. Dashed boxes indicate  
635 enzymes that were not found in our dataset. The process of FA elongation and desaturation is  
636 shown in Figure 5.

637 Figure 4. Chromatograms of total fatty acid esters from *Eutreptiella* sp. Note that DHA (peak 19)  
638 was the most abundant fatty acid. Corresponding fatty acids (labeled by length of carbon, e.g.  
639 C16) were listed in Table 3. (A) Chromatogram of fatty acid esters from the phosphate-replete  
640 cultures. (B) Chromatogram of fatty acid esters from the phosphate-depleted cultures. Insets are  
641 closer-ups of some of the small peaks of esters. The first number (bold-typed) by the peak is  
642 peak ID, the second number retention time, and the third number peak area (only trace elements  
643 are shown). Note that retention times between the two samples are slightly different.

644 Figure 5. Putative pathways of fatty acids elongation and desaturation inferred from *Eutreptiella*  
645 sp. transcriptome annotation and GC/MS/MS analyses. Boxes with dashed lines indicate the  
646 enzymes or substrates that were not found in our study.

647 Figure 6. Expression levels of genes involved in fatty acids biosynthesis in *Eutreptiella* sp. HD:  
648 high-lipid-dark cultures. HL: high-lipid-light cultures. LL: low-lipid-light cultures. LD: low-  
649 lipid-dark cultures.

650 Figure 7. Expression levels of genes involved in fatty acids biosynthesis (FAD,  $\Delta 8$ , and TE) and  
651 triacylglycerol biosynthesis (GPD, GPAT, and AGPT). HD: high-lipid-dark cultures. HL: high-  
652 lipid-light cultures. LL: low-lipid-light cultures. LD: low-lipid-dark cultures.

653 Figure 8. Expression levels of genes involved in carbon fixation. HD: high-lipid-dark cultures.  
654 HL: high-lipid-light cultures. LL: low-lipid-light cultures. LD: low-lipid-dark cultures.

655

656

657

658

659 Table 1. Genes potentially involved in fatty lipid biosynthesis in *Eutreptiella* sp. Sequences and  
 660 BLAST results were listed in the supporting file “lipid\_biosynthesis\_genes”.

| Gene                                           | EC code      | Number of transcripts |
|------------------------------------------------|--------------|-----------------------|
| <b>Fatty acid biosynthesis</b>                 |              |                       |
| Acetyl-CoA carboxylase                         | EC 6.4.1.2   | 2                     |
| Fatty acid synthase (animal type)              | EC 2.3.1.85  | 1                     |
| Acyl-ACP thioesterase                          | EC 3.1.2.14  | 1                     |
| Acyl carrier protein                           |              | 1                     |
| $\beta$ -ketoacyl-ACP reductase                | EC 1.1.1.100 | 3                     |
| <b>Fatty acid desaturation</b>                 |              |                       |
| $\Delta^5$ desaturase                          | EC 1.14.19.- | 2                     |
| $\Delta^6$ desaturase                          | EC 1.14.19.- | 5                     |
| $\Delta^8$ desaturase                          | EC 1.14.19.- | 2                     |
| $\Delta^9$ desaturase<br>(Acyl-ACP desaturase) | EC 1.14.19.2 | 1                     |
| $\Delta^{12}$ desaturase                       | EC 1.14.19.- | 1                     |
| $\Delta^{15}$ desaturase                       | EC 1.14.19.- | 1                     |
| <b>Fatty acid elongation</b>                   |              |                       |
| $\Delta^5$ elongase                            |              | 1                     |
| $\Delta^6$ elongase                            | EC 1.14.19.- | 1                     |
| $\Delta^9$ elongase                            | EC 1.14.19.2 | 1                     |
| Palmitoyl-CoA hydrolase                        | EC 3.1.2.2   | 1                     |
| Palmitoyl hydrolase                            | EC 3.1.2.22  | 1                     |
| acetyl-CoA C-acyltransferase                   | EC 2.3.1.16  | 1                     |
| 3-hydroxyacyl-CoA dehydrogenase                | EC 1.1.1.35  | 2                     |
| <b>Triacylglycerol biosynthesis</b>            |              |                       |
| Glycerol-3-phosphate dehydrogenase             | EC 1.1.5.3   | 1                     |
| Glycerol3-phosphate acyltransferase            | EC 2.3.1.15  | 2                     |
| Acylglycerophosphate acyltransferase           | EC 2.3.1.51  | 2                     |
| <b>Fatty acid metabolism</b>                   |              |                       |
| Acyl-CoA dehydrogenase                         | EC 1.3.99.3  | 3                     |
| Long-chain-fatty-acid-CoA ligase               | EC 6.2.1.3   | 2                     |
| Acetyl-CoA C-acyltransferase                   | EC 2.3.1.16  | 1                     |
| 3-hydroxyacyl-CoA dehydrogenase                | EC 1.1.1.35  | 2                     |
| Carnitine o-palmitoyltransferase               | EC 2.3.1.21  | 1                     |
| Enoyl-CoA hydratase                            | EC 4.2.1.17  | 1                     |
| Acetyl-CoA thiolase                            | EC 2.3.1.9   | 1                     |
| Aldehyde dehydrogenase (AND+)                  | EC 1.2.1.3   | 2                     |

661 Table 2. Types and relative abundance of fatty acids detected in *Eutreptiella* sp.

| Peak ID | Retention time | Systematic name                         | Abbreviation | Relative abundance (%)F/2* | Relative abundance (%)F/2-P* |
|---------|----------------|-----------------------------------------|--------------|----------------------------|------------------------------|
| 1       | 26.19          | 4,7,10,13-Hexadecatetraenoic acid       | 16:4(n-3)    | 98.04                      | 11.44                        |
| 2       | 26.37          | 7,10-Hexadecadienoic acid               | 16:2(n-6)    | 2.59                       | 0.08                         |
| 3       | 26.47          | 7,10,13-Hexadecatrienoic acid           | 16:3(n-3)    | 12.63                      | 0.54                         |
| 4       | 26.62          | 7-Hexadecenoid acid                     | 16:1(n-9)    | 11.89                      | 0.27                         |
| 5       | 26.97          | 9-Hexadecenoid acid                     | 16:1(n-7)    | 13.54                      | 0.79                         |
| 6       | 27.1           | Hexadecanoic acid                       | 16:0         | 90.45                      | 11.28                        |
| 7       | 29.11          | 6,9,12-Octadecatrienoic acid            | 18:3(n-6)    | 3.90                       | 0.13                         |
| 8       | 30.04          | 6,9,12,15-Octadecatetraenoic acid       | 18:4(n-3)    | 41.00                      | 12.40                        |
| 9       | 30.23          | 9,12-Octadecadienoic acid               | 18:2(n-6)    | 3.20                       | 0.53                         |
| 10      | 30.36          | 9,12,15-Octadecatrienoic acid           | 18:3(n-3)    | 72.63                      | 23.58                        |
| 11      | 30.47          | 9-Octadecenoic acid                     | 18:1(n-9)    | 7.97                       | 0.58                         |
| 12      | 30.85          | Octadecanoic acid                       | 18:0         | 8.43                       | 2.12                         |
| 13      | 33.1           | 5,8,11,14-Eicosatetraenoic acid         | 20:4(n-6)    | 6.44                       | 1.88                         |
| 14      | 33.22          | 5,8,11,14,17-Eicosapentaenoic acid      | 20:5(n-3)    | 78.69                      | 40.02                        |
| 15      | 33.53          | 8,11,14,17-Eicosatetraenoic acid        | 20:4(n-3)    | 8.39                       | 4.02                         |
| 16      | 33.77          | 8,11-Eicosadienoic acid                 | 20:2(n-9)    | 1.13                       | 0.71                         |
| 17      | 33.87          | 11,14,17-Eicosatrienoic acid            | 20:3(n-3)    | 3.16                       | 1.02                         |
| 18      | 36.17          | 4,7,10,13,16-Docosapentaenoic acid      | 22:5(n-6)    | 68.78                      | 54.93                        |
| 19      | 36.3           | 4,7,10,13,16,19-Docosahexaenoic acid    | 22:6(n-3)    | 100.00                     | 100.00                       |
| 20      | 36.4           | 7,10,13,16-Docosatetraenoic acid        | 22:4(n-6)    | 43.11                      | 47.18                        |
| 21      | 36.49          | 7,10,13,16,19-Docosapentaenoic acid     | 22:5(n-3)    | 3.56                       | 6.03                         |
| 22      | 37.54          | Docosanoic acid                         | 22:0         | 5.94                       | 1.01                         |
| 23      | 38.79          | 6,9,12,15,18,21-Tetracosahexaenoic acid | 24:6 (n-3)   | 5.32                       | 0.85                         |
| 24      | 40.14          | 15-Tetracosenoic acid                   | 24:1(n-9)    | 0.46                       | -                            |

662  
663 \*The numbers of relative abundance were obtained by dividing the peak area of the fatty acid to  
664 the peak area of DHA; F/2 and F/2-P depict phosphate-replete and phosphate-depleted F/2  
665 medium, respectively.  
666

667 Table 3. Primers used in reverse-transcription quantitative PCR (RT-qPCR) analysis in this  
668 study.

| Primer name    | Sequences (5'-3')         | RT-qPCR for <i>Eutreptiella</i> sp. gene                  |
|----------------|---------------------------|-----------------------------------------------------------|
| ACPF1          | GCAGCAAAGCAAATCAAACCA     | acyl carrier protein forward                              |
| ACPF2          | CAACCCAACTCTCACTTCTACAT   | acyl carrier protein forward                              |
| ACPR           | GCATCAGCGACCGATAACAATA    | acyl carrier protein reverse                              |
| AGPCF          | TTACGAACTTGCGATGCTTCA     | 1-acyl-sn-glycerol-3-phosphate<br>acyltransferase forward |
| AGPCR1         | GGAGGTATGATTGGAGATGATGAG  | 1-acyl-sn-glycerol-3-phosphate<br>acyltransferase reverse |
| AGPCR2         | CGATGACTTGACACCACCAA      | 1-acyl-sn-glycerol-3-phosphate<br>acyltransferase reverse |
| ACCASE-F       | GTGTTGGCATGTTGTCTCTTG     | ACCcase forward                                           |
| ACCASE-R1      | GGATACCGCCATTGGAACC       | ACCcase reverse                                           |
| ACCASE-R2      | GAAGTCGGCTTGAATCTGTGA     | ACCcase reverse                                           |
| DELTA8FADF     | GACATCATTGAGAATTATCGGAACC | delta-8 fatty acid desaturase<br>forward                  |
| DELTA8FADR1    | GCGTCACCATCAGCATAGC       | delta-8 fatty acid desaturase reverse                     |
| DELTA8FADR2    | CGGAAGTCCTCAGCAACCT       | delta-8 fatty acid desaturase reverse                     |
| PRKF           | TTCCAAGCCAATCTACAACCAT    | Phosphoribulokinase forward                               |
| PRKR1          | CGAATCTGAGACGGAAGAACTT    | Phosphoribulokinase reverse                               |
| PRKR2          | GCAACACGGTCATCCAACA       | Phosphoribulokinase reverse                               |
| ThioesteraseF  | AGCAATCGGCAGGAGCAA        | Thioesterase forward                                      |
| ThioesteraseR1 | ACAGGCAAGCGGCATCT         | Thioesterase reverse                                      |
| ThioesteraseR2 | TGGAACAACGGCAGCAATG       | Thioesterase reverse                                      |
| KAR1-F         | AAGCCATCGCTGTTGGATTG      | $\beta$ -Ketoacyl-ACP reductase1<br>forward               |
| KAR1-R1        | ACCGCATCCCAATCAGCAA       | $\beta$ -Ketoacyl-ACP reductase1 reverse                  |
| KAR1-R2        | CTGATTCGTAATGTCTGCCTGAA   | $\beta$ -Ketoacyl-ACP reductase1<br>forward               |
| KAR2-F1        | TTCAACGACGCAGCCTGTA       | $\beta$ -Ketoacyl-ACP reductase2<br>forward               |
| KAR2-F2        | CCGTCAACTCGCTCATTGTT      | $\beta$ -Ketoacyl-ACP reductase2<br>forward               |
| KAR2-R         | GCCTCTTCTGTCATCTTGTCAA    | $\beta$ -Ketoacyl-ACP reductase2 reverse                  |
| KAR3-F1        | CGGTGCTTCCAGAGGTGTT       | $\beta$ -Ketoacyl-ACP reductase3<br>forward               |
| KAR3-F2        | GGAGCCTCTGTGGTTGTCA       | $\beta$ -Ketoacyl-ACP reductase3<br>forward               |
| KAR3-R1        | TTCATCTGCTTGTCCATCATCTC   | $\beta$ -Ketoacyl-ACP reductase3 reverse                  |
| FAD-F          | AACATTCTAACGCCACACCAT     | FAD family gene forward                                   |
| FAD-R1         | ACTGCCACATTGAGACTCCT      | FAD family gene reverse                                   |
| FAD-R2         | ACAGTCGGTGCGTTGTAATC      | FAD family gene reverse                                   |
| GPD-F          | CTTGGCAGGCTTCTGTAATCG     | glycerol-3-phosphate<br>dehydrogenase forward             |

|            |                          |                                              |
|------------|--------------------------|----------------------------------------------|
| GPD-R1     | GCTTCGTGGATCGTGAGGA      | glycerol-3-phosphate dehydrogenase reverse   |
| GPD-R2     | ATCACCACAACATCGTACTCCT   | glycerol-3-phosphate dehydrogenase reverse   |
| GPAT-F     | CCAGATGAGGCTTCTTCTACAA   | glycerol-3-phosphate acyltransferase forward |
| GPAT-R1    | CAACAGCGATGGCGTTCAT      | glycerol-3-phosphate acyltransferase reverse |
| GPAT-R2    | TCACCGCATCCACGAACT       | glycerol-3-phosphate acyltransferase reverse |
| PEPCASE-F  | GCCTGTCTTGAATGACTCCTT    | Phosphoenolpyruvate carboxylase forward      |
| PEPCASE-R1 | GCATACTTGACCAGCAGTGA     | Phosphoenolpyruvate carboxylase reverse      |
| PEPCASE-R2 | CCGTGGTTCTGGATCAGGTT     | Phosphoenolpyruvate carboxylase reverse      |
| PEPCK1-F1  | AAGGCTCTGGCGACATTAAG     | Phosphoenolpyruvate carboxykinase1 forward   |
| PEPCK1-F2  | TGGCGACATTAAGAACAGCATA   | Phosphoenolpyruvate carboxykinase1 forward   |
| PEPCK1-R   | TCTGGTTGAGAGGAATGAGTGT   | Phosphoenolpyruvate carboxykinase1 reverse   |
| PEPCK2-F   | TGGTATTGATTGAGCACACAATG  | Phosphoenolpyruvate carboxykinase2 forward   |
| PEPCK2-R1  | GAGGTCTTGATTGTGGATTGGAAT | Phosphoenolpyruvate carboxykinase2 reverse   |
| PEPCK2-R2  | TACTTGCGGATCTCGGTGATA    | Phosphoenolpyruvate carboxykinase2 reverse   |
| PEPCK3-F   | GCAACGGACGATGTGAACC      | Phosphoenolpyruvate carboxykinase3 forward   |
| PEPCK3-R1  | CGCATGTGAGGAACCAACTG     | Phosphoenolpyruvate carboxykinase2 reverse   |
| PEPCK3-R2  | GTCTGATTGCGGTCCAACCTAT   | Phosphoenolpyruvate carboxykinase2 reverse   |
| PPDK-F1    | CTTATCTCCCACAAATGACTACCC | phosphate dikinase forward                   |
| PPDK-F2    | ACTGGTTCATCTTCGCCTCAT    | phosphate dikinase forward                   |
| PPDK-R     | TCAGCCAAGTTCGCACCTT      | phosphate dikinase reverse                   |
| EF-1aF     | GCACCTCTCACCATCTTACAAT   | elongation factor 1 alpha forward            |
| EF-1aR1    | GTTCCGCCTTCAGCTTGTC      | elongation factor 1 alpha reverse            |
| EF-1aR2    | TTTCCTTTCGCTTTCCTTCTT    | elongation factor 1 alpha reverse            |
| TubulinF   | CCTTGGYCAGGCTGGTATCC     | tubulin forward                              |
| TubulinR1  | CGGCGTTGAAGCACAAGAA      | tubulin reverse                              |
| TubulinR2  | AGTTGTTGGCGGCATCCT       | tubulin reverse                              |
| ActinF     | AAGCGAAGCGTGGTATCTTG     | actin forward                                |
| ActinR1    | ACATAATCTGCGTCATCTTCTCC  | actin reverse                                |
| ActinR2    | GGTTCATAGGAGCCTCAGTGA    | actin reverse                                |

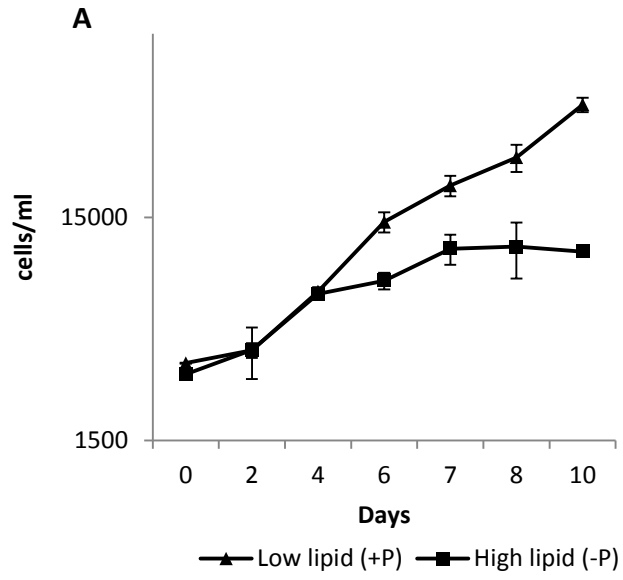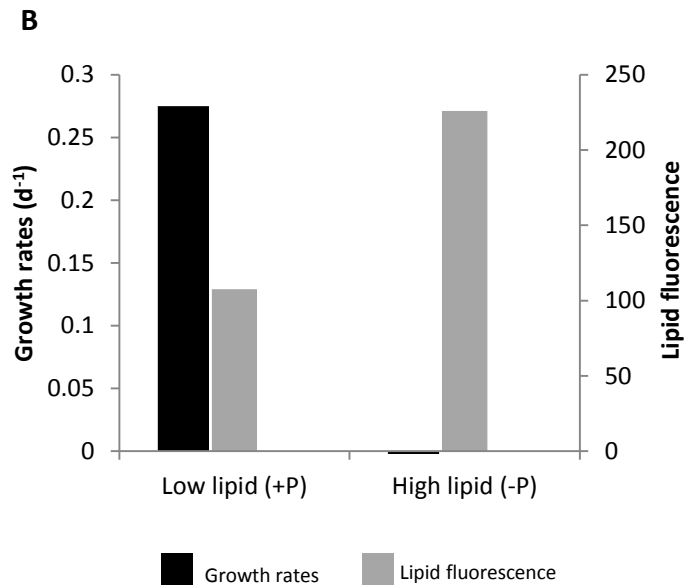

Kuo et al. Figure 1

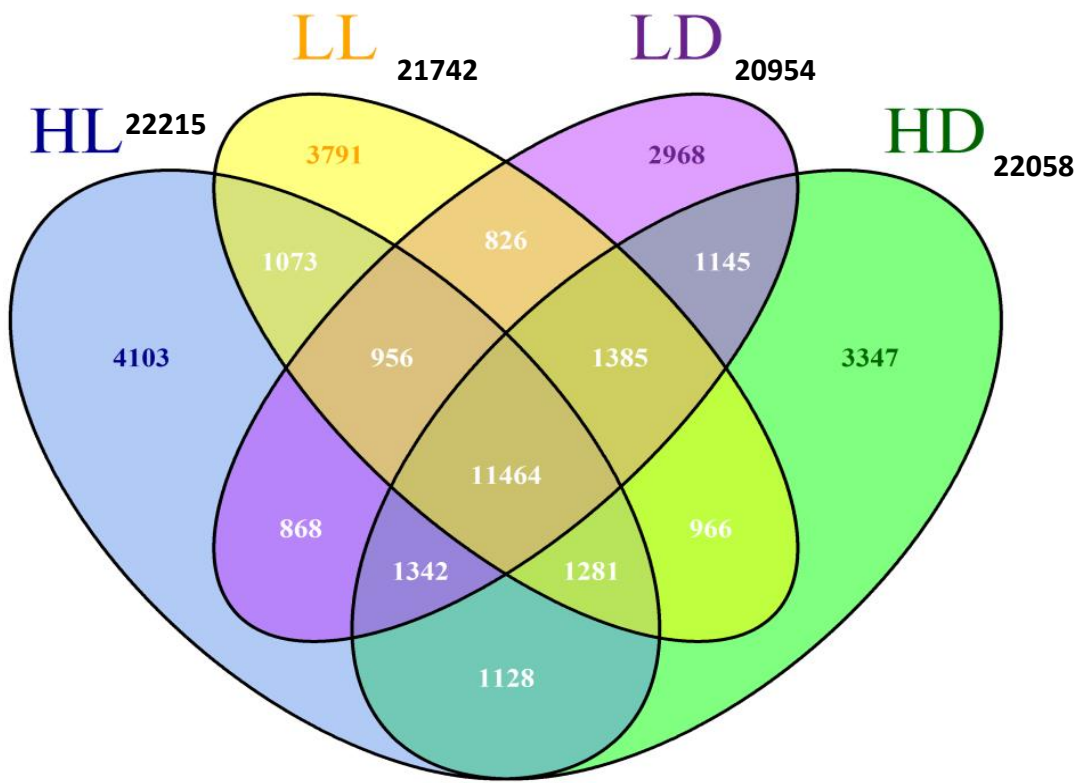

Kuo et al. Figure 2



FAT biosynthesis pathway

TAG biosynthesis pathway

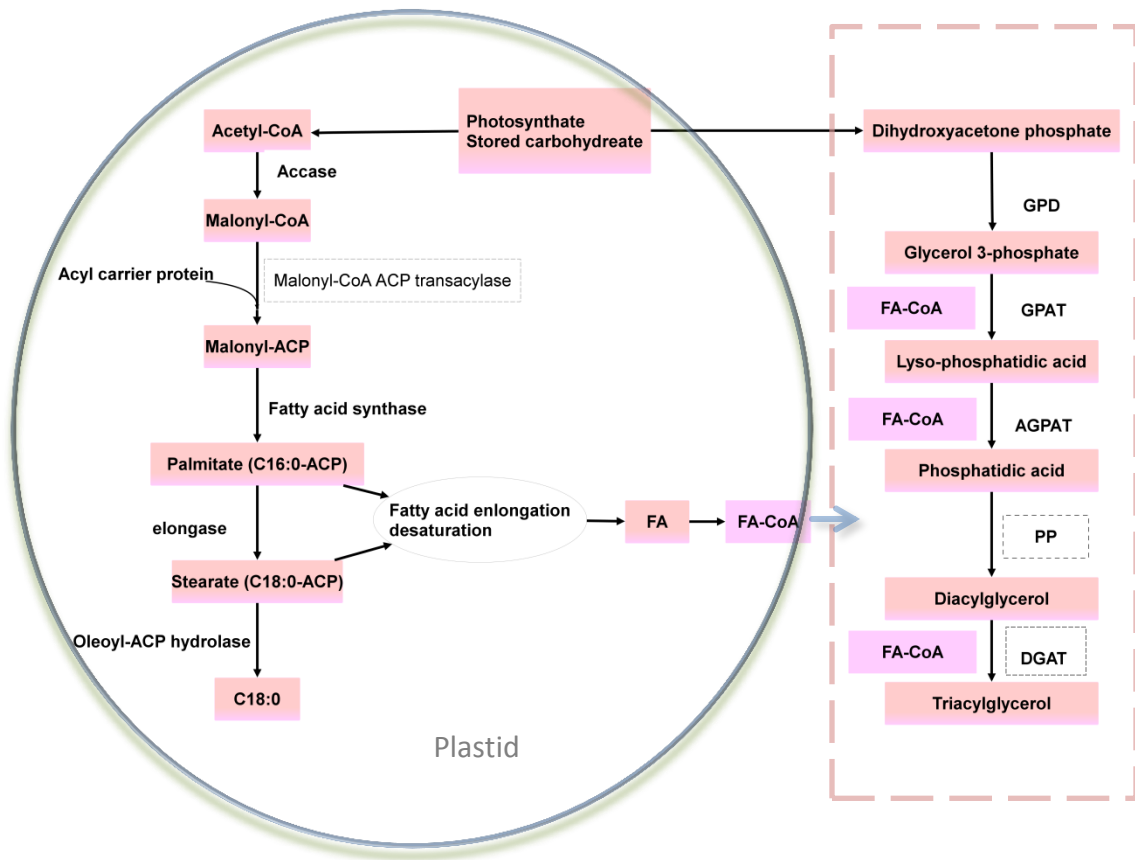

Kuo et al. Figure 3

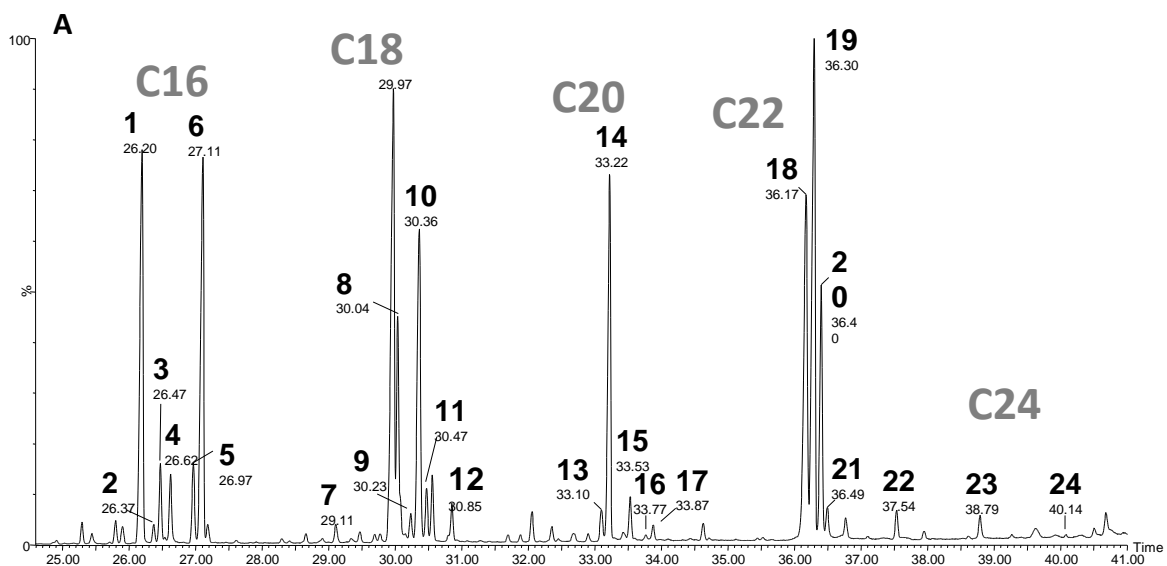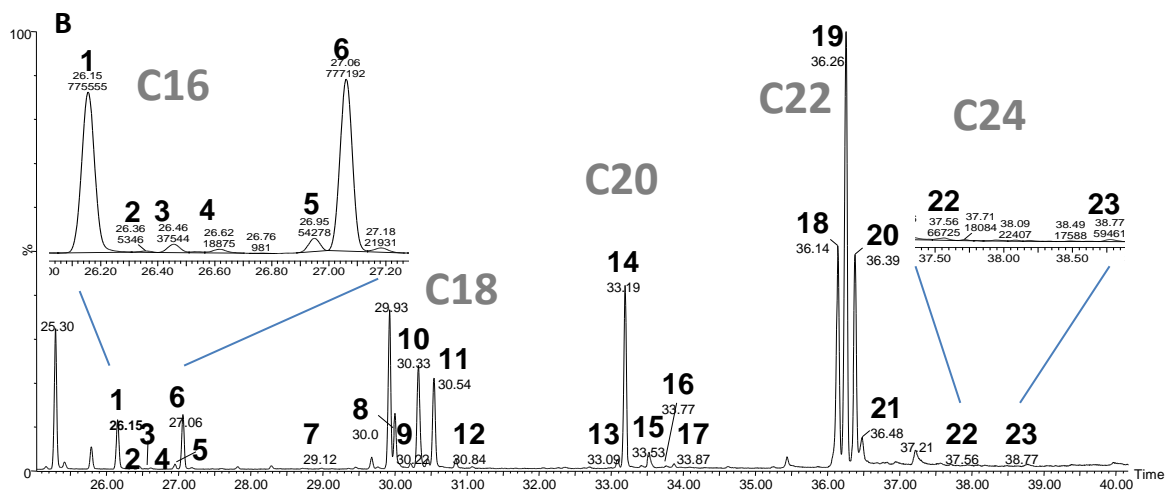

Kuo et al. Figure 4

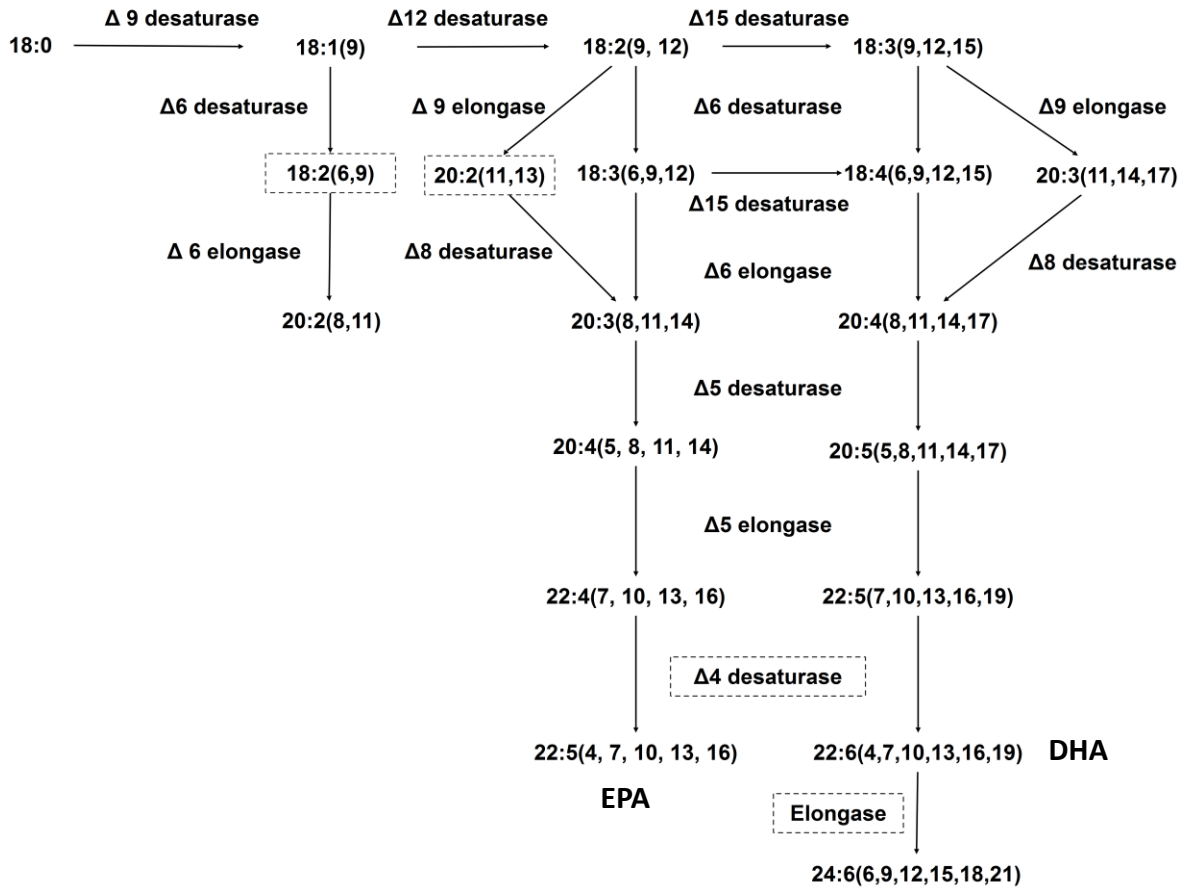

Kuo et al. Figure 5

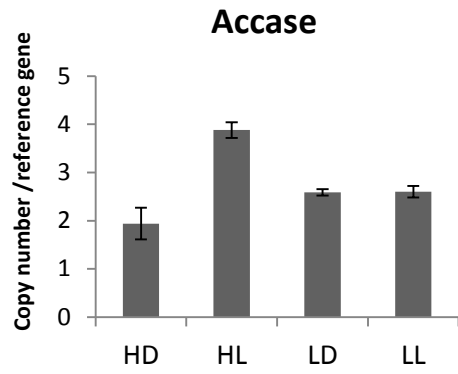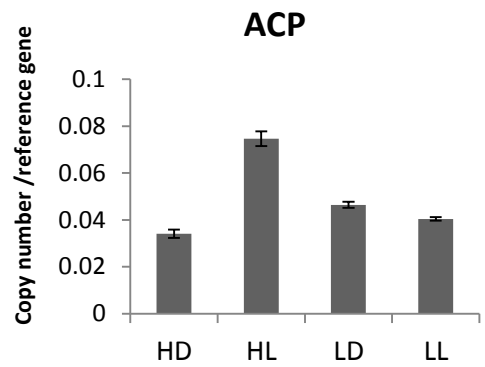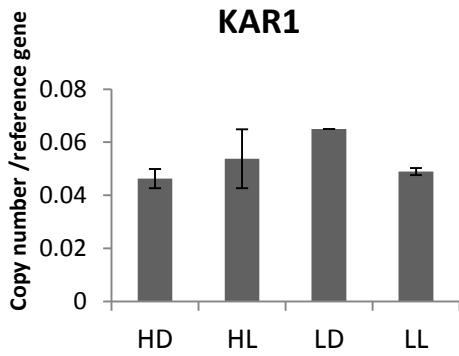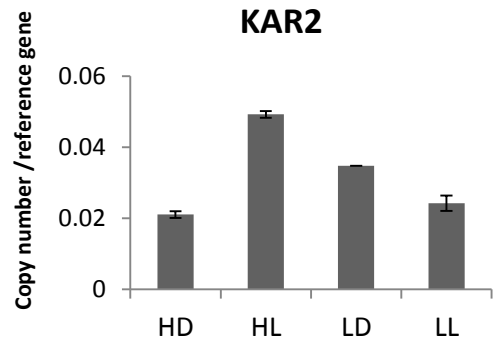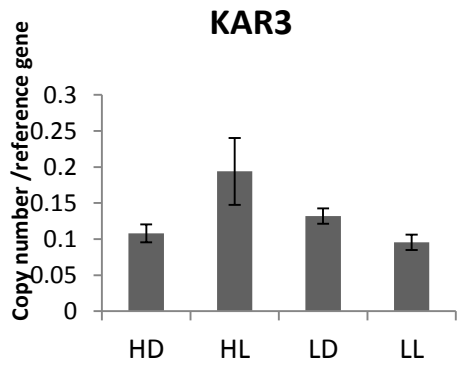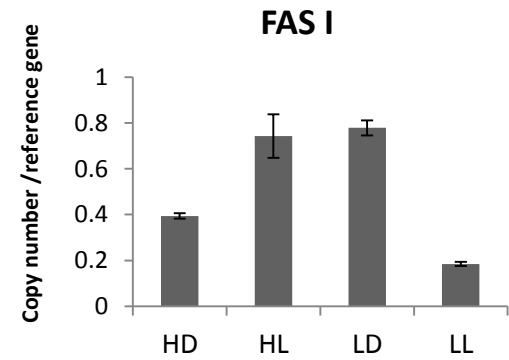

Kuo et al. Figure 6

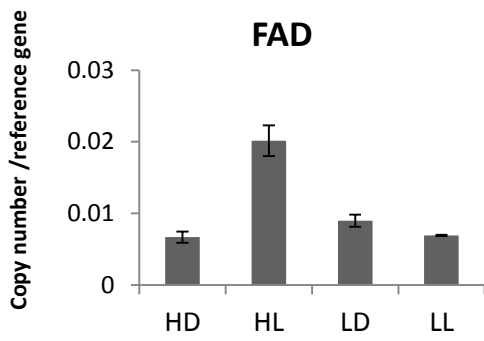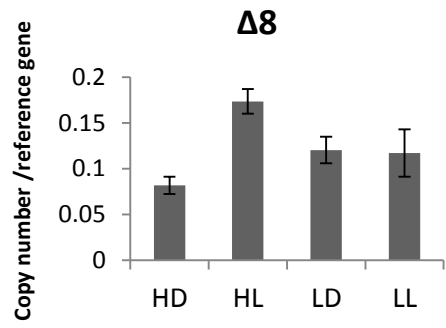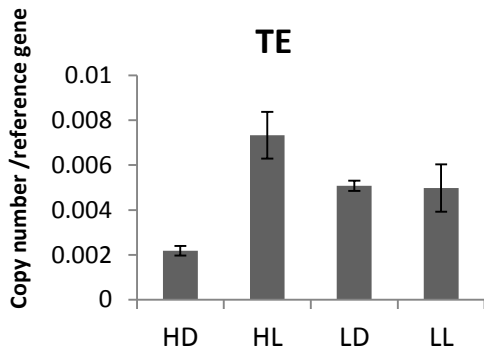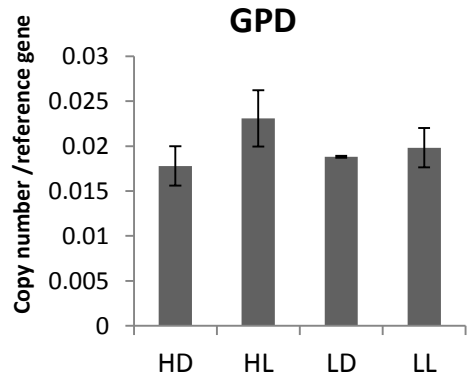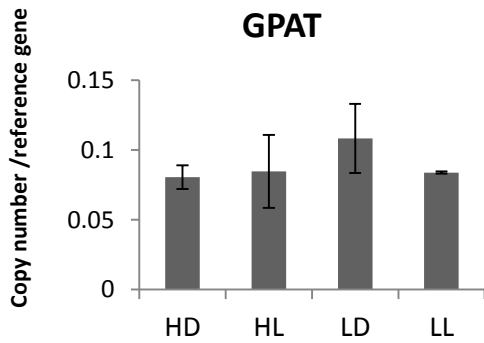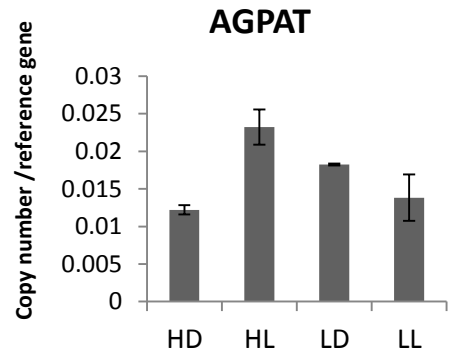

Kuo et al. Figure 7

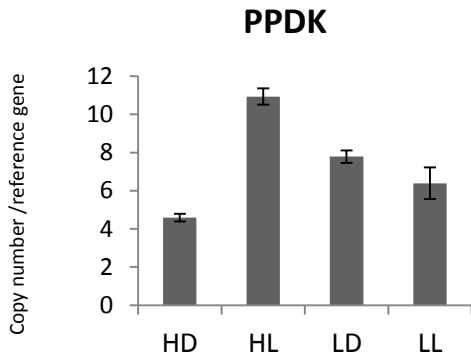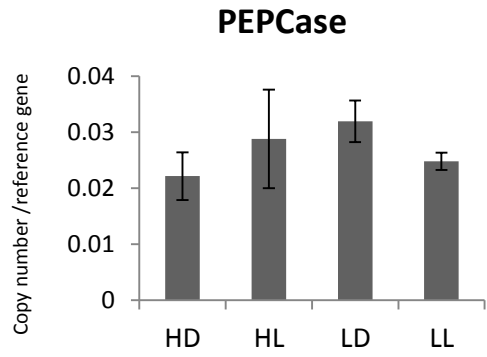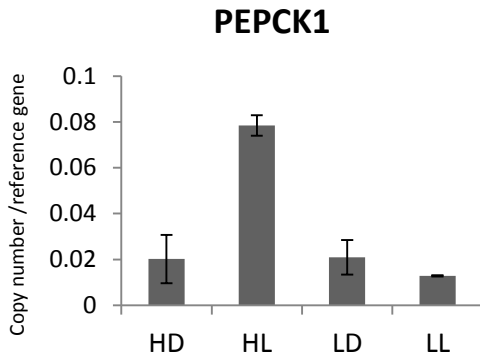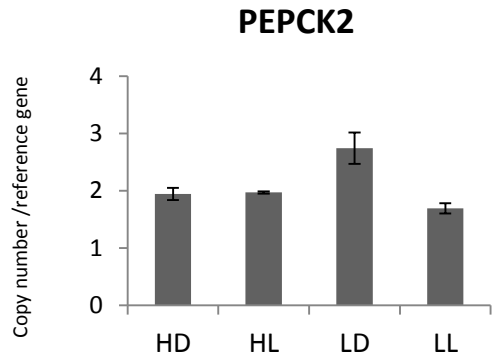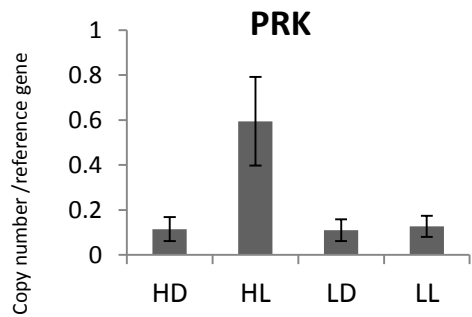

Kuo et al. Figure 8
